# Supplementary material for: Physiological, Biochemical and Transcriptomic Analysis of the Aerial Parts (Leaf-Blade and Petiole) of Asarum sieboldii Responding to Drought Stress
Source: MDPI journal article supplement (doi:10.3390/ijms222413402), 2021-12-13

**Table S19** Primers used for qRT-PCR analysis.

| Primers         |   | Sequence (5'-3')        |
|-----------------|---|-------------------------|
| c22420.graph_c0 | F | ACTTCAGAAGGAGCTCATAAG   |
|                 | R | CTTAGTGGGAGACATGGAGTG   |
| c28909.graph_c0 | F | ACACACTTGTCGATTACCTG    |
|                 | R | AGCGCACGCAGAAGTAGGTT    |
| c56553.graph_c0 | F | ATGCACAACCGATCCTCTG     |
|                 | R | GGATTTGAAATTCCGAGGATG   |
| c59933.graph_c0 | F | ACTCATGTCCTCAGGCAGAAG   |
|                 | R | TCCTCAGCCCCGAAACTCCTG   |
| c59927.graph_c0 | F | ATTACTCGCCAGCAACGCCCT   |
|                 | R | ACCTCACCGGGTGCGTTCA     |
| c59949.graph_c0 | F | ATGCACCACTATCCAAGGCTGA  |
|                 | R | ATTGAGCCATGGCTTCCTTCTTG |
| c26113.graph_c0 | F | ACATGTGTACTCGACCGCA     |
|                 | R | TCATTAAAGCTTACTTGGAAGG  |
| c25401.graph_c0 | F | ATGGGTGGATCTGAGGAAGT    |
|                 | R | AGTCCAATGGCCTCTGATCCCTT |
| c22977.graph_c0 | F | ATTGGCCGGAGACGGGAC      |
|                 | R | AAGCTTCTCTCCATCGAC      |
| 18SrRNA         | F | AACGAGACCTCAGCCTGCT     |
|                 | R | CCCAGAACATCTAAGGGCA     |

**Figure S1** The mass data of methyleugenol, safrole and myristicin.

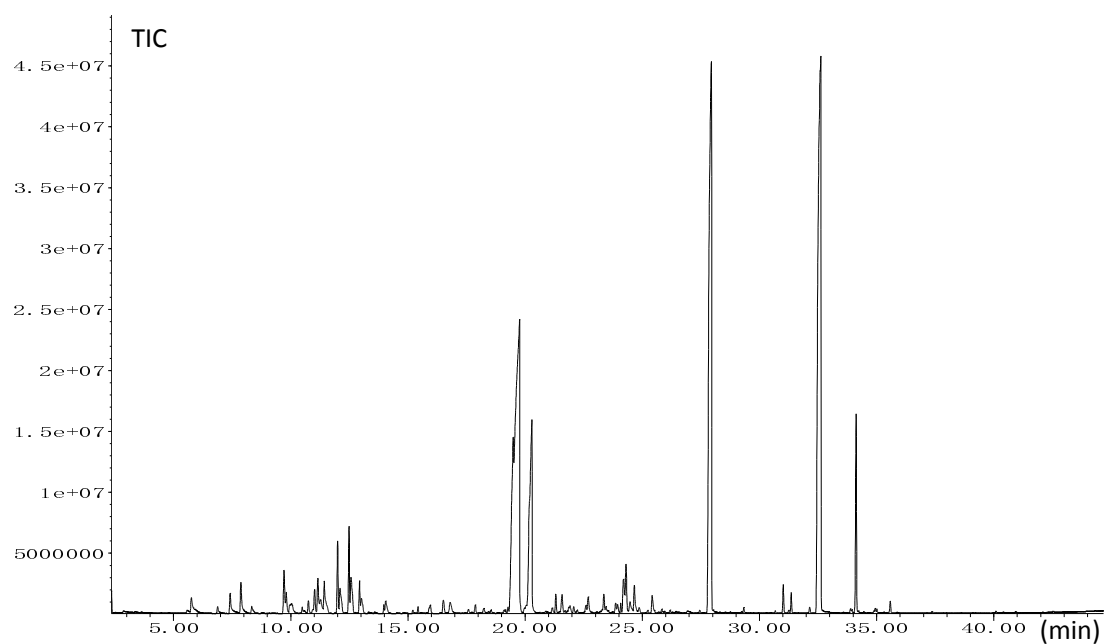

1) Methyleugenol (Rt 30.671 min)

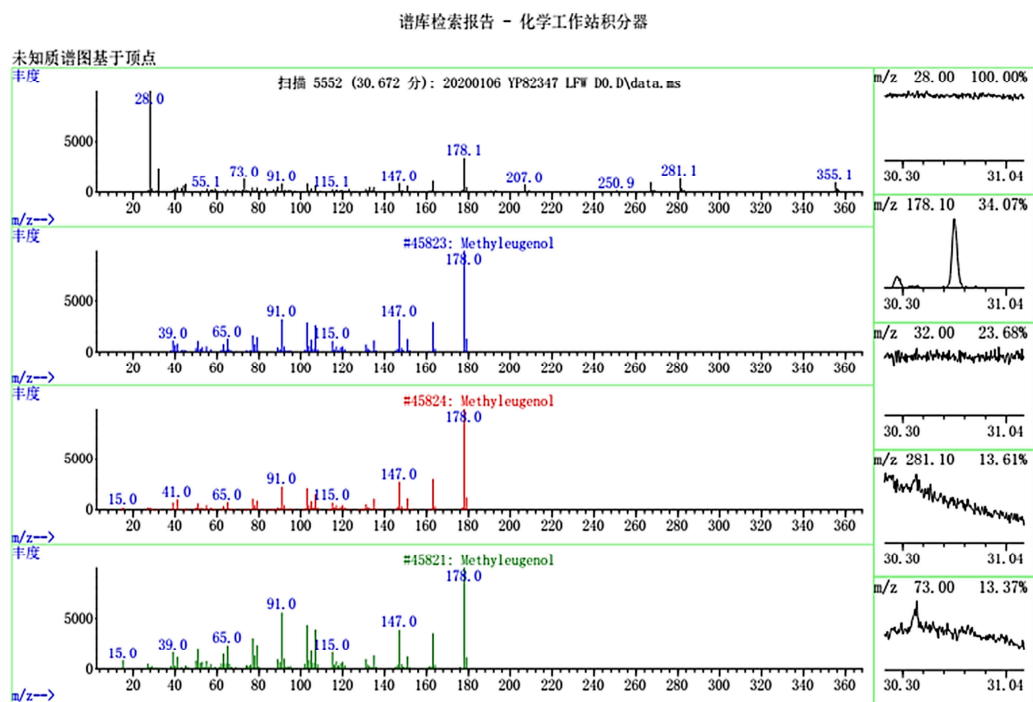

样品:

峰编号: 136      30.671 分钟处    面积: 1503368    面积 % 0.01

每个谱库中 3 个最匹配的记录。

|                      | Ref\# | CAS\#             | 匹配度 |
|----------------------|-------|-------------------|-----|
| C:\Database\NIST14.L |       |                   |     |
| 1 Methyleugenol      |       | 45823 000093-15-2 | 95  |
| 2 Methyleugenol      |       | 45824 000093-15-2 | 95  |
| 3 Methyleugenol      |       | 45821 000093-15-2 | 86  |

2) Safrole (Rt 27.828 min)

谱库检索报告 - 化学工作站积分器

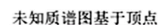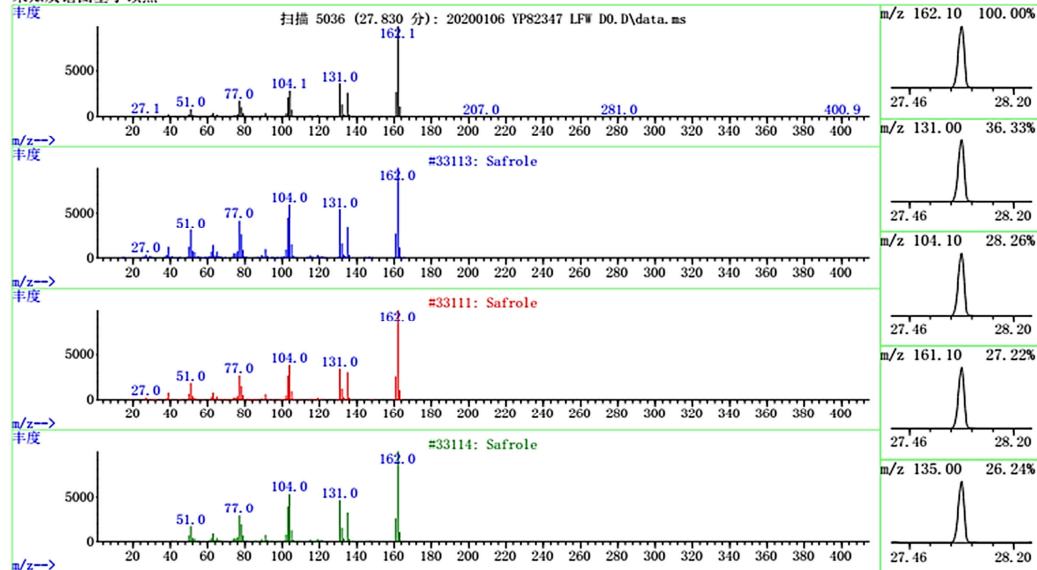

样品:

峰编号: 123      27.828 分钟处    面积: 459077264    面积 % 3.93

每个谱库中 3 个最匹配的记录。

|                      |       |             |    |
|----------------------|-------|-------------|----|
| C:\Database\NIST14.L |       |             |    |
| 1 Safrole            | 33113 | 000094-59-7 | 97 |
| 2 Safrole            | 33111 | 000094-59-7 | 97 |
| 3 Safrole            | 33114 | 000094-59-7 | 96 |

## 3) Myristicin (Rt 32.574 min)

谱库检索报告 - 化学工作站积分器

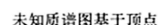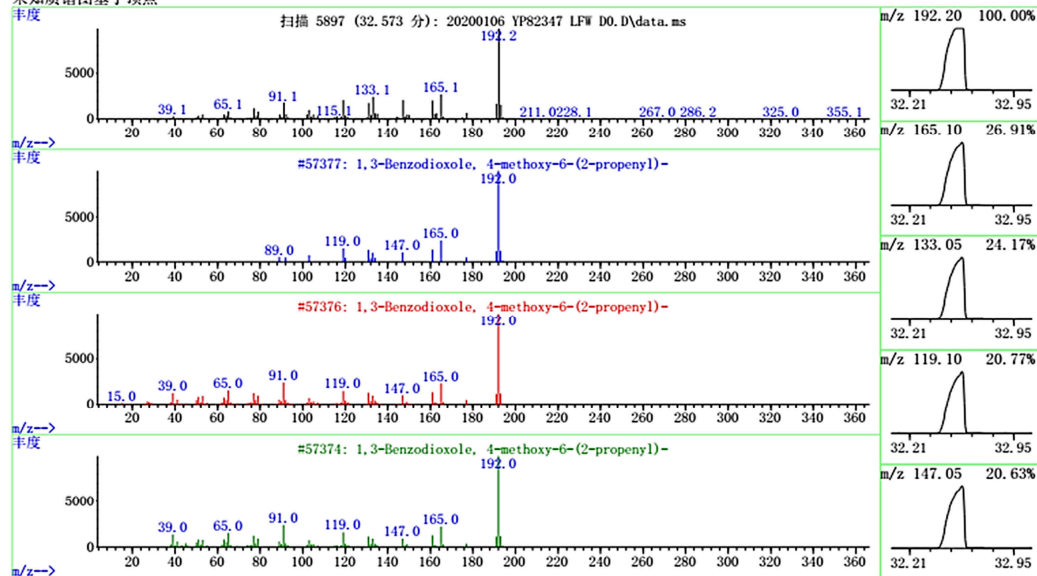

样品:

峰编号: 144      32.574 分钟处    面积: 2973819548    面积 % 25.46

每个谱库中 3 个最匹配的记录。

| NAME                 | PRENOM                              | NUMERO | DATE        | PROX |
|----------------------|-------------------------------------|--------|-------------|------|
| C:\Database\NIST14.L |                                     |        |             |      |
| 1                    | 1,3-Benzodioxole, 4-methoxy-6-(2... | 57377  | 000607-91-0 | 96   |
| 2                    | 1,3-Benzodioxole, 4-methoxy-6-(2... | 57376  | 000607-91-0 | 96   |
| 3                    | 1,3-Benzodioxole, 4-methoxy-6-(2... | 57374  | 000607-91-0 | 95   |

**Figure S2** Cluster analysis of DEGs.

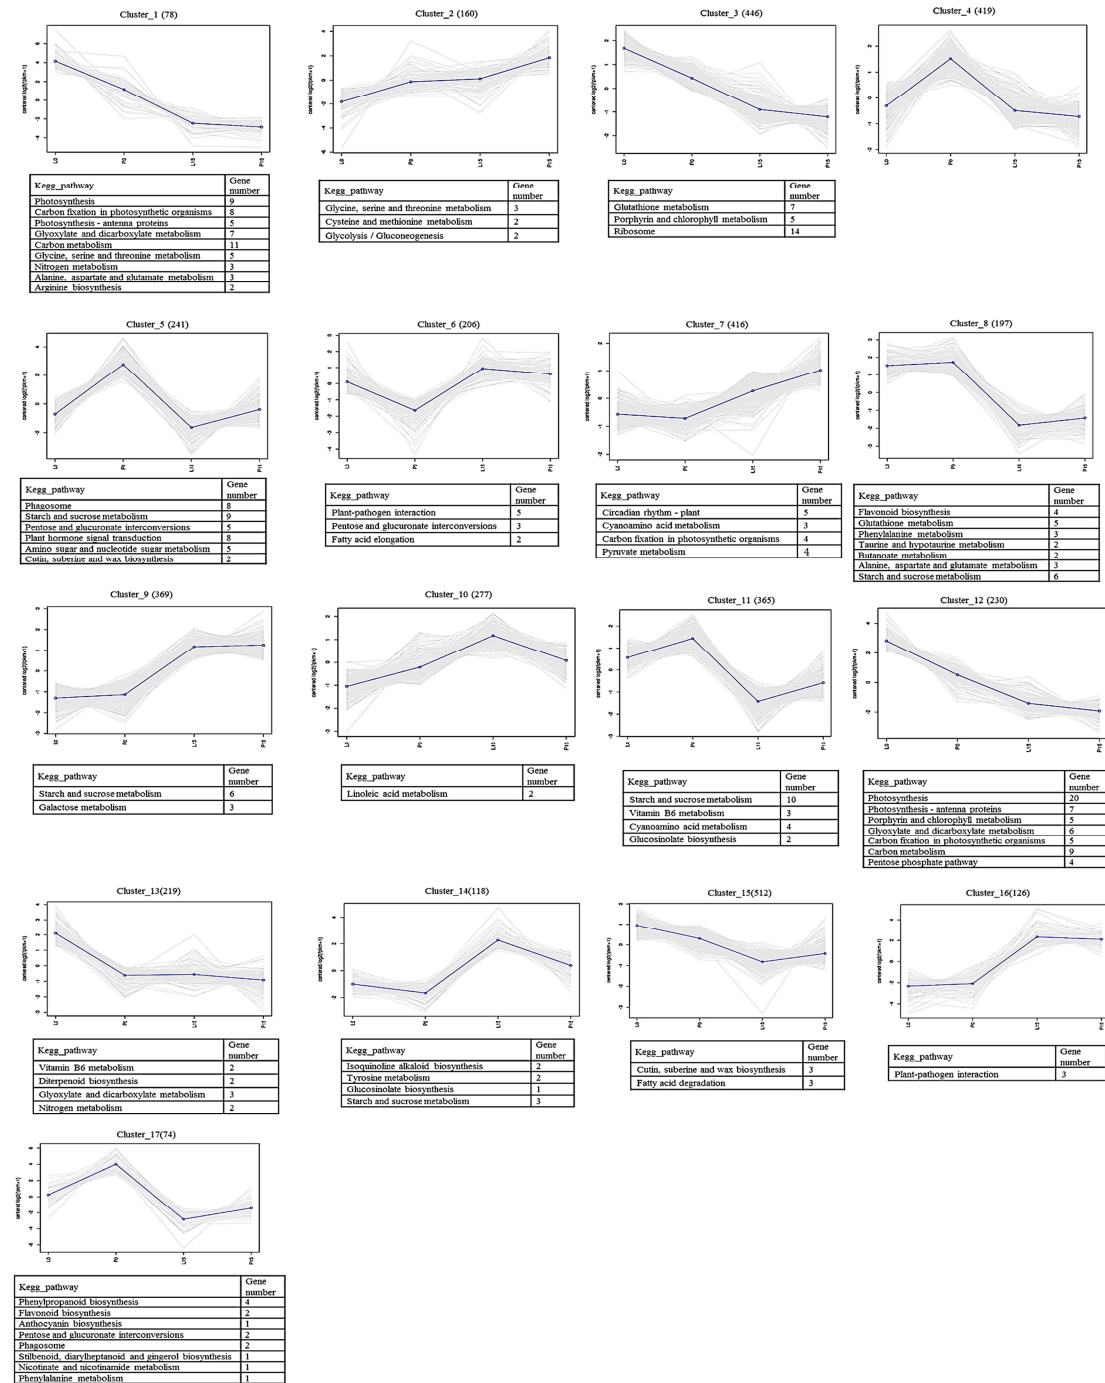

Supplement: s1 [file s1]
